# Supplementary material
Source: publisher figshare collection journal article supplement (https://sage.figshare.com/ndownloader/files/14841131)
Supplement: Supplementary file 1 [file 14841131]

|                                                 | Healthy Controls    | Multiple Sclerosis   |                     |                     |
|-------------------------------------------------|---------------------|----------------------|---------------------|---------------------|
|                                                 | All<br>N = 51       | PPMS<br>N = 28       | SPMS<br>N = 35      | RRMS<br>N = 56      |
| Mean periventricular NAWM MTR gradient $\pm$ SE |                     |                      |                     |                     |
| -baseline (pu/band)                             | 0.122 $\pm$ 0.038   | 0.952 $\pm$ 0.185    | 1.360 $\pm$ 0.143   | 1.031 $\pm$ 0.117   |
| -annual change (pu/band/year)                   | -0.011 $\pm$ 0.051  | 0.090 $\pm$ 0.040    | 0.021 $\pm$ 0.030   | 0.046 $\pm$ 0.069   |
| Mean NAWM MTR $\pm$ SE                          |                     |                      |                     |                     |
| -baseline (pu)                                  | 39.779 $\pm$ 0.111  | 38.254 $\pm$ 0.281   | 38.282 $\pm$ 0.143  | 38.780 $\pm$ 0.142  |
| -annual change (pu/year)                        | -0.289 $\pm$ 0.150  | -0.231 $\pm$ 0.107   | -0.446 $\pm$ 0.099  | 0.032 $\pm$ 0.139   |
| Mean NAWM volume $\pm$ SE                       |                     |                      |                     |                     |
| -baseline (cm <sup>3</sup> )                    | 460.091 $\pm$ 6.665 | 415.386 $\pm$ 10.490 | 383.094 $\pm$ 7.337 | 413.295 $\pm$ 7.477 |
| -annual change (cm <sup>3</sup> /year)          | -4.671 $\pm$ 3.973  | -1.248 $\pm$ 0.442   | -1.314 $\pm$ 0.541  | -0.611 $\pm$ 0.515  |
| Mean cortical GM MTR gradient $\pm$ SE          |                     |                      |                     |                     |
| -baseline (pu)                                  | -2.860 $\pm$ 0.051  | -3.214 $\pm$ 0.103   | -3.328 $\pm$ 0.101  | -3.072 $\pm$ 0.058  |
| -annual change (pu/band/year)                   | 0.090 $\pm$ 0.146   | -0.018 $\pm$ 0.039   | 0.037 $\pm$ 0.009   | 0.047 $\pm$ 0.070   |
| Mean cortical GM MTR $\pm$ SE                   |                     |                      |                     |                     |
| -baseline (pu)                                  | 32.183 $\pm$ 0.093  | 30.998 $\pm$ 0.206   | 30.556 $\pm$ 0.154  | 31.509 $\pm$ 0.140  |
| -annual change (pu/year)                        | -0.071 $\pm$ 0.239  | -0.238 $\pm$ 0.090   | -0.346 $\pm$ 0.097  | -0.145 $\pm$ 0.148  |
| Mean CGM volume $\pm$ SE                        |                     |                      |                     |                     |
| -baseline (cm <sup>3</sup> )                    | 612.545 $\pm$ 7.463 | 570.030 $\pm$ 12.886 | 534.389 $\pm$ 8.917 | 570.364 $\pm$ 8.241 |
| -annual change (cm <sup>3</sup> /year)          | -5.490 $\pm$ 5.393  | -3.427 $\pm$ 1.071   | -1.363 $\pm$ 0.888  | -2.668 $\pm$ 0.741  |

|                                          |                   |                    |                    |                    |
|------------------------------------------|-------------------|--------------------|--------------------|--------------------|
| Mean brain parenchymal fraction $\pm$ SE |                   |                    |                    |                    |
| -baseline                                | $0.761 \pm 0.001$ | $0.738 \pm 0.004$  | $0.726 \pm 0.003$  | $0.743 \pm 0.002$  |
| -annual change                           | $0.001 \pm 0.001$ | $-0.001 \pm 0.001$ | $-0.001 \pm 0.001$ | $-0.001 \pm 0.000$ |
| Mean T2 lesion number $\pm$ SE           |                   |                    |                    |                    |
| -baseline                                | N/A               | $41.1 \pm 5.8$     | $43.2 \pm 4.1$     | $42.6 \pm 4.1$     |
| -annual change                           | N/A               | $-3.3 \pm 1.3$     | $-2 \pm 1.5$       | $0.3 \pm 0.8$      |

eTable 2: *Imaging outcomes at baseline and annualised changes during follow-up in healthy controls, people with primary progressive multiple sclerosis (PPMS) and people with secondary progressive multiple sclerosis (SPMS). BPF=brain parenchymal fraction. GM=grey matter. NAWM=normal appearing white matter. SE=standard error. MTR is expressed as percentage units (pu).*

The NAWM periventricular gradient was significantly shallower (less abnormal) in healthy controls ( $0.122 \pm 0.038$  pu/band) compared to those with RRMS ( $1.031 \pm 0.117$  pu/band,  $p < 0.0001$ ). This persisted when the model was additionally adjusted for mean NAWM MTR ( $p = 0.002$ ) or when adjusted for BPF instead of NAWM volume ( $p = 0.034$ ). The cortical gradient was significantly shallower (less abnormal) in healthy controls ( $-2.860 \pm 0.051$  pu/band) compared to RRMS ( $-3.072 \pm 0.058$  pu/band,  $p = 0.030$ ). These differences lost significance when the model was additionally adjusted for mean cortical GM MTR ( $p = 0.668$ ) or when the model covaried for BPF instead of cortical volume ( $p = 0.975$ ).
